# Supplementary material for: Association of Plasma and Cerebrospinal Fluid Alzheimer Disease Biomarkers With Race and the Role of Genetic Ancestry, Vascular Comorbidities, and Neighborhood Factors
Source: PubMed Central journal article supplement (PMC9539715; doi:10.1001/jamanetworkopen.2022.35068), 2022-10-06
Supplement: jamanetwopen-e2235068-s001.pdf [file jamanetwopen-e2235068-s001.pdf]

## Supplementary Online Content

Hajjar I, Yang Z, Okafor M, et al. Association of plasma and cerebrospinal fluid Alzheimer disease biomarkers with race and the role of genetic ancestry, vascular comorbidities, and neighborhood factors. *JAMA Netw Open*. 2022;5(10):e2235068.  
doi:10.1001/jamanetworkopen.2022.35068

**eFigure.** Selected Biomarkers According to Their Apolipoprotein E (APOE)  $\epsilon$ 4 Genotype: Positive and Negative Between White and African American

**eTable.** Mediation Effect Summary (P Values)

This supplementary material has been provided by the authors to give readers additional information about their work.

**eFigure.** Selected Biomarkers According to Their Apolipoprotein E (APOE)  $\epsilon$ 4 Genotype: Positive and Negative Between White and African American

P-value were obtained from t-test.

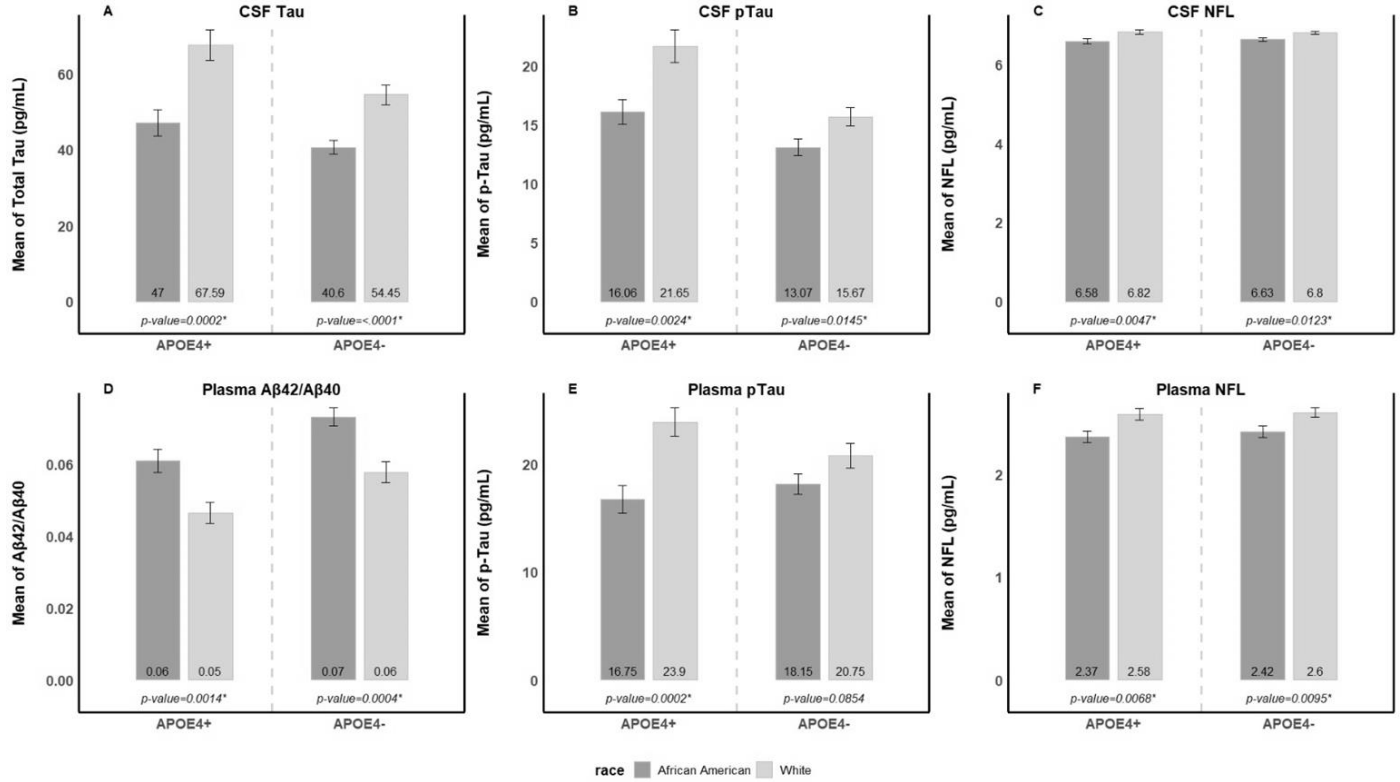

**eTable. Mediation Effect Summary (P Values)**

| Mediation           |                           | M1/CRP       |               |                 | M1/Mean SBP Siting |               |                 | M1/BMI       |               |                 |
|---------------------|---------------------------|--------------|---------------|-----------------|--------------------|---------------|-----------------|--------------|---------------|-----------------|
| Source              | Variables                 | Total Effect | Direct Effect | Indirect Effect | Total Effect       | Direct Effect | Indirect Effect | Total Effect | Direct Effect | Indirect Effect |
| CSF AlzBio Innotest | A $\beta$ 42              | 0.10         | 0.13          | 0.71            | 0.033              | 0.063         | 0.46            | 0.13         | 0.25          | 0.30            |
|                     | Tau                       | <.0001       | <.0001        | 0.70            | <.0001             | <.0001        | 0.67            | <.0001       | <.0001        | 0.41            |
|                     | pTau <sub>181</sub>       | 0.0052       | 0.0033        | 0.67            | 0.0036             | 0.0017        | 0.25            | 0.0023       | 0.0003        | 0.040           |
| CSF LUMIPULSE       | A $\beta$ 42              | 0.34         | 0.40          | 0.97            | 0.25               | 0.25          | 0.96            | 0.27         | 0.29          | 0.81            |
|                     | A $\beta$ 40              | 0.14         | 0.22          | 0.77            | 0.14               | 0.15          | 0.96            | 0.19         | 0.12          | 0.81            |
|                     | Tau                       | 0.060        | 0.017         | 0.69            | 0.011              | 0.011         | 0.99            | 0.034        | 0.016         | 0.81            |
|                     | pTau <sub>181</sub>       | 0.041        | 0.031         | 0.74            | 0.024              | 0.024         | 0.97            | 0.028        | 0.017         | 0.82            |
|                     | A $\beta$ 42/A $\beta$ 40 | 0.018        | 0.019         | 0.78            | 0.011              | 0.010         | 0.96            | 0.046        | 0.014         | 0.81            |
| CSF, SIMOA          | NFL                       | 0.15         | 0.16          | 0.82            | 0.20               | 0.13          | 0.36            | 0.20         | 0.32          | 0.27            |
| Plasma              | A $\beta$ 42              | 0.14         | 0.15          | 0.89            | 0.16               | 0.24          | 0.29            | 0.14         | 0.45          | 0.11            |
|                     | A $\beta$ 40              | 0.060        | 0.041         | 0.65            | 0.0064             | 0.0061        | 0.79            | 0.0050       | 0.0028        | 0.30            |
|                     | pTau <sub>181</sub>       | 0.019        | 0.022         | 0.98            | 0.019              | 0.075         | 0.15            | 0.023        | 0.057         | 0.26            |
|                     | A $\beta$ 42/A $\beta$ 40 | 0.42         | 0.32          | 0.64            | <.0001             | <.0001        | 0.33            | <.0001       | 0.0001        | 0.27            |
|                     | NFL                       | 0.24         | 0.24          | 0.88            | 0.35               | 0.26          | 0.38            | 0.29         | 0.79          | 0.016           |

| Mediation           |                           | M1/ ADI      |               |                 | M1/APOE4     |               |                 |
|---------------------|---------------------------|--------------|---------------|-----------------|--------------|---------------|-----------------|
| Source              | Variables                 | Total Effect | Direct Effect | Indirect Effect | Total Effect | Direct Effect | Indirect Effect |
| CSF AlzBio Innotest | A $\beta$ 42              | 0.11         | 0.74          | 0.10            | 0.15         | 0.17          | 0.50            |
|                     | Tau                       | <.0001       | 0.0004        | 0.70            | <.0001       | <.0001        | 0.48            |
|                     | pTau <sub>181</sub>       | 0.0099       | 0.036         | 0.99            | 0.0017       | 0.0018        | 0.58            |
| CSF LUMIPULSE       | A $\beta$ 42              | 0.43         | 0.92          | 0.50            | 0.47         | 0.37          | 0.77            |
|                     | A $\beta$ 40              | 0.11         | 0.064         | 0.30            | 0.089        | 0.072         | 0.78            |
|                     | Tau                       | 0.016        | 0.046         | 0.66            | 0.024        | 0.0075        | 0.77            |
|                     | pTau <sub>181</sub>       | 0.034        | 0.061         | 0.57            | 0.037        | 0.013         | 0.77            |
|                     | A $\beta$ 42/A $\beta$ 40 | 0.017        | 0.10          | 0.95            | 0.050        | 0.0023        | 0.77            |
| CSF, SIMOA          | NFL                       | 0.27         | 0.080         | 0.14            | 0.19         | 0.18          | 0.91            |
| Plasma              | A $\beta$ 42              | 0.25         | 0.48          | 0.87            | 0.16         | 0.12          | 0.54            |
|                     | A $\beta$ 40              | 0.014        | 0.030         | 0.53            | 0.0062       | 0.0055        | 0.67            |
|                     | pTau <sub>181</sub>       | 0.023        | 0.021         | 0.43            | 0.020        | 0.019         | 0.70            |
|                     | A $\beta$ 42/A $\beta$ 40 | 0.0001       | 0.0021        | 0.59            | <.0001       | <.0001        | 0.52            |
|                     | NFL                       | 0.28         | 0.052         | 0.050           | 0.31         | 0.33          | 0.59            |
